# Supplementary material for: 2-Aminoadipic acid is a biomarker for diabetes risk
Source: JCI journal article supplement (doi:10.1172/jci64801), 2013-09-15

## SUPPLEMENTAL FIGURE LEGENDS

**Supplemental Figure 1.** Serial weights and food intake in control and 2-AAA treated animals.

**Supplemental Figure 2.** Insulin tolerance tests were performed after completion of chronic 2-AAA treatment in mice fed either the standard chow or the high-fat diet (n=12 per condition)

**Supplemental Figure 3.** BTC6 cells were incubated with 2-AAA at concentrations ranging from 0 to 100  $\mu$ M for 24 hours as per **Figure 5A**, but in the presence of higher ambient glucose (5.0 mM).

**Supplemental Figure 4.** Representative dose-response study using isotope-labeled standard for 2-AAA in normal pooled human plasma is shown. The parent to product ion MRM transition used for 2-AAA-d3 was m/z 163 to m/z 119, while the MRM transition for endogenous 2-AAA was 160 to 116. Boxes represent mean data from calibration curves run at the beginning, middle, and end of each analytical batch of ~150 samples. The median concentration of the endogenous 2-AAA in the control samples as assessed by the LC-MS method is denoted with an arrow

(1.22 $\mu$ M). Peak areas were >2 orders of magnitude above the lower limit of quantitation (as defined as a discrete peak 10-fold greater than noise, lowest dose with a closed box) and fell well within the linear range of the dose-response relationship.

**Supplemental Table 1: Metabolite profiling in individuals with and without incident diabetes (Framingham Heart Study).** The 57 metabolites listed were detected in at least 70% of the study sample.

| Metabolite                               | Paired T-statistic | P-value |
|------------------------------------------|--------------------|---------|
| 2-aminoadipate                           | 3.39               | 0.0009  |
| quinolinate                              | 2.53               | 0.0121  |
| PEP                                      | 2.49               | 0.0138  |
| UDP-galactose/UDP-glucose                | 2.42               | 0.0164  |
| hippurate                                | -2.19              | 0.0294  |
| F1P/F6P/G1P/G6P                          | 2.24               | 0.0265  |
| beta-hydroxybutyrate                     | -1.95              | 0.0529  |
| UDP                                      | 1.91               | 0.0583  |
| 3-methyladipate                          | -1.85              | 0.0657  |
| salicylurate                             | 1.77               | 0.0780  |
| isocitrate                               | 1.61               | 0.11    |
| alpha-glycerophosphate                   | 1.58               | 0.12    |
| kynurenine                               | 1.56               | 0.12    |
| hypoxanthine                             | -1.44              | 0.15    |
| urate                                    | 1.43               | 0.15    |
| glycodeoxycholate/glycochenodeoxycholate | 1.36               | 0.18    |
| glycocholate                             | 1.31               | 0.19    |
| 4-pyridoxate                             | -1.26              | 0.21    |
| phosphoglycerate                         | 1.23               | 0.22    |
| lactate                                  | 1.13               | 0.26    |
| hydroxyphenylacetate                     | 1.13               | 0.26    |
| pantothenate                             | -1.09              | 0.28    |
| adipate                                  | -0.99              | 0.32    |
| xanthurenate                             | 0.96               | 0.34    |
| fumarate/maleate                         | -0.91              | 0.36    |
| indole-3-propionate                      | -0.90              | 0.37    |
| alpha-ketoglutarate                      | -0.88              | 0.38    |
| xanthine                                 | 0.78               | 0.44    |
| citrate                                  | -0.76              | 0.45    |
| GDP                                      | 0.75               | 0.45    |
| alpha-hydroxybutyrate                    | -0.74              | 0.46    |
| GMP                                      | 0.73               | 0.46    |
| indoxylsulfate                           | 0.71               | 0.48    |
| uridine                                  | 0.65               | 0.52    |

|                                                                 |       |      |
|-----------------------------------------------------------------|-------|------|
| cystathionine                                                   | 0.64  | 0.53 |
| ribose-5-phosphate/ribulose-5-phosphate                         | 0.63  | 0.53 |
| pyruvate                                                        | 0.56  | 0.57 |
| sucrose                                                         | 0.54  | 0.59 |
| oxalate                                                         | -0.43 | 0.67 |
| hyodeoxycholate/ursodeoxycholate/chenodeoxycholate/deoxycholate | 0.41  | 0.68 |
| suberate                                                        | -0.34 | 0.74 |
| gentisate                                                       | 0.30  | 0.76 |
| aconitate                                                       | 0.29  | 0.77 |
| inositol                                                        | -0.29 | 0.77 |
| inosine                                                         | 0.26  | 0.79 |
| taurocholate                                                    | -0.26 | 0.80 |
| ADP                                                             | 0.26  | 0.80 |
| propionate                                                      | 0.25  | 0.80 |
| AMP                                                             | 0.25  | 0.81 |
| orotate                                                         | 0.18  | 0.86 |
| phosphocreatine                                                 | 0.15  | 0.88 |
| lactose                                                         | 0.13  | 0.90 |
| cAMP                                                            | -0.13 | 0.92 |
| taurodeoxycholate/taurochenodeoxycholate                        | 0.09  | 0.93 |
| 2-hydroxyglutarate                                              | -0.09 | 0.93 |
| malate                                                          | -0.08 | 0.94 |
| sorbitol                                                        | 0.04  | 0.97 |

---

Results are from paired t-tests (case minus control) for each variable.

**Supplemental Table 2: Biochemical measures of glycemia in study samples**

|                                   | <b>Framingham Heart Study</b> |                                     | <b>Malmö Diet and Cancer Study</b> |                                     |
|-----------------------------------|-------------------------------|-------------------------------------|------------------------------------|-------------------------------------|
|                                   | <b>Cases<br/>(n=188)</b>      | <b>Matched Controls<br/>(n=188)</b> | <b>Cases<br/>(n=162)</b>           | <b>Matched Controls<br/>(n=162)</b> |
| <b>Fasting glucose, mg/dl</b>     | 105 (14)                      | 106 (12)                            | 97 (13)                            | 97 (11)                             |
| <b>Hemoglobin A1c, %</b>          | 5.5 (0.7)                     | 5.4 (0.8)                           | -                                  | -                                   |
| <b>Fasting insulin, uIU/ml</b>    | 11.7 (11.4)                   | 9.9 (9.6)                           | 9.0 (6.0)                          | 9.0 (6.0)                           |
| <b>HOMA-IR</b>                    | 3.0 (2.8)                     | 2.5 (2.6)                           | 2.2 (1.4)                          | 2.1 (1.7)                           |
| <b>2-hour OGTT glucose, mg/dl</b> | 123 (44)                      | 115 (39)                            | -                                  | -                                   |
| <b>Prediabetes, %</b>             | 79%                           | 83%                                 | 47%                                | 40%                                 |

Values are medians and IQR. Prediabetes is defined as hemoglobin A1c of 5.7 to 6.4% or fasting glucose of 100 to 125 mg/dl.

**Supplemental Table 3: Relative risk of diabetes for individuals in the top quartile of 2-AAA and other metabolic predictors**

|                       | <b>Case-control sample</b> | <b>“Whole cohort” sample</b> |
|-----------------------|----------------------------|------------------------------|
| 2-AAA                 | 4.56 (1.93-10.75)          | 2.07 (1.31-3.28)             |
| Insulin               | 1.76 (0.97-3.20)           | 2.49 (1.56-3.99)             |
| Glucose               | N/A                        | 4.23 (2.16-8.40)             |
| 2-hour glucose (OGTT) | 2.54 (1.30-5.00)           | 3.12 (1.98-4.92)             |
| BMI                   | N/A                        | 3.34 (1.91-5.84)             |
| HbA1c                 | 1.64 (0.74-3.61)           | 2.04 (1.25-3.34)             |

Values shown are odds ratios (case-control sample) or hazard ratios (whole cohort sample) from age- and sex-adjusted regression models. 95% confidence intervals are shown in the parentheses.

N/A: not analyzed in the case-control sample because individuals were matched according to fasting glucose and BMI.

**Supplemental Table 4: Distribution of 2-AAA concentrations.** To estimate normative values for 2-AAA, we selected a healthy reference sample comprised of individuals from the Framingham Offspring Cohort who met the following criteria: no prior cardiovascular disease, no hypertension, BMI less than 30 kg/m<sup>2</sup>, no valvular heart disease, and estimated glomerular filtration rate >60 (n=819). The mean age in the reference sample was 52 years, and 57% were female. Absolute quantitation for 2-AAA was performed using an isotope-labeled reference compound. The full distribution of 2-AAA values in the reference sample is shown below. The mean for the cases was 1.55  $\mu$ M; the mean for the controls was 1.40  $\mu$ M.

| <b>Quantile</b> | <b>2-AAA level (<math>\mu</math>M)</b> |
|-----------------|----------------------------------------|
| 0% (Minimum)    | 0.42                                   |
| 10%             | 0.76                                   |
| 25% Q1          | 0.96                                   |
| 50% (Median)    | 1.22                                   |
| 75% Q3          | 1.53                                   |
| 90%             | 1.93                                   |
| 100% (Maximum)  | 8.77                                   |

Supplemental Figure 1

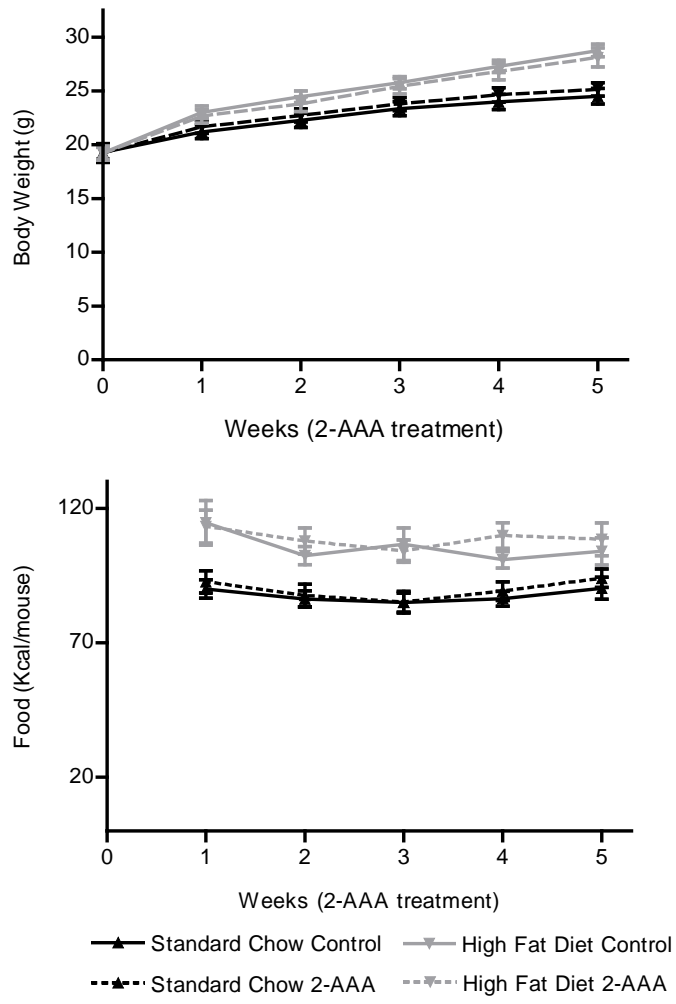



Supplemental Figure 2

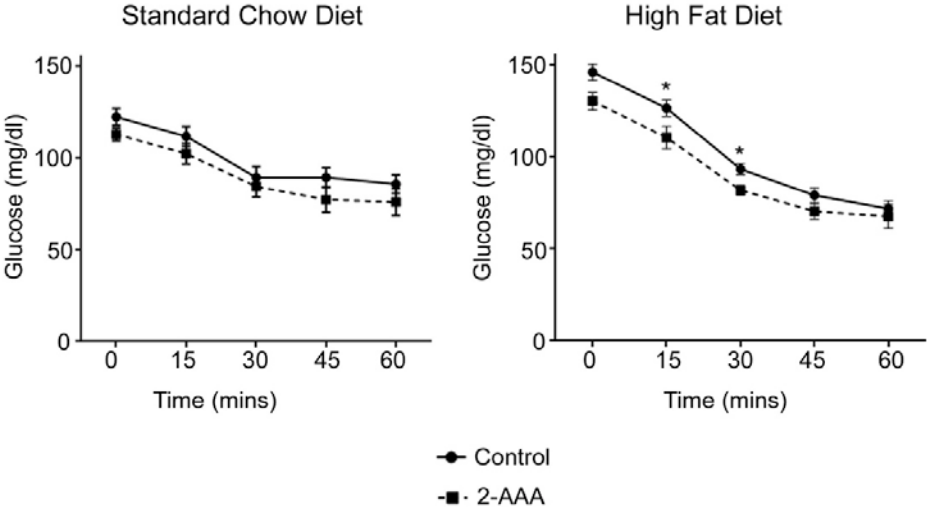

Supplemental Figure 3

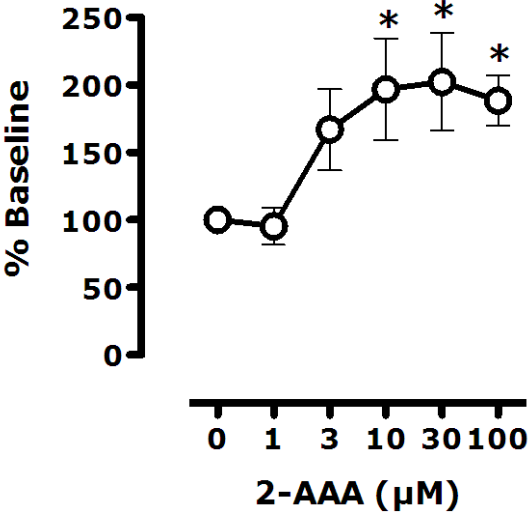

Supplemental Figure 4

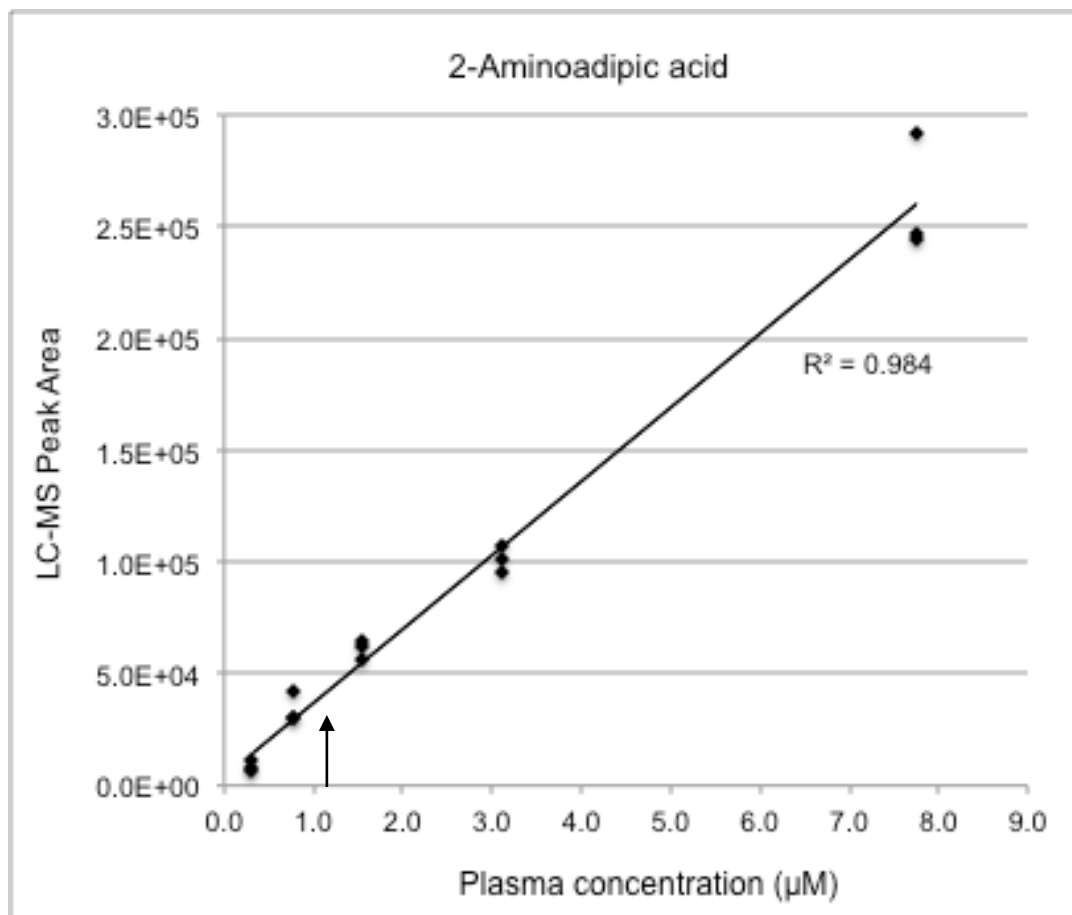

Supplement: sd1 [file 1]
